# Supplementary material for: Interaction of 9-Methoxyluminarine with Different G-Quadruplex Topologies: Fluorescence and Circular Dichroism Studies
Source: MDPI journal article supplement (doi:10.3390/ijms221910399), 2021-09-27
Supplement: s1 [file s1]

## Supporting Information

### Interaction of luminarine with different G-quadruplex topologies: fluorescence and circular dichroism studies

Joanna Nowak-Karnowska<sup>1</sup>, Agata Głuszyńska<sup>1,\*</sup>, Joanna Kosman<sup>1</sup>, Grażyna Neunert<sup>2</sup>, Anna Dembska<sup>1,\*</sup>

<sup>1</sup> Department of Bioanalytical Chemistry, Faculty of Chemistry, Adam Mickiewicz University, Uniwersytetu Poznańskiego 8, Poznań 61-614, Poland;

<sup>2</sup> Department of Physics and Biophysics, Faculty of Food Science and Nutrition, Poznań University of Life Sciences, Wojska Polskiego 38/42, 60-637 Poznań, Poland

\* Correspondence: aglusz@amu.edu.pl (A.G.), aniojka@amu.edu.pl (A.D.)

#### Contents:

**Figure S1.** Fluorescence titration spectra of 9-methoxyluminarine (9-MeLM) ligand (1  $\mu$ M) with G4 *c-MYC* (A), G4 TBA (B), G4 22HT/K (C) and G4 22HT/Na (D) (0–7  $\mu$ M) in Tris-HCl buffer (10 mM, pH 7.2) containing 100 mM KCl (A-C) or 100 mM NaCl (D).

**Figure S2.** Emission decay curves of 9-methoxyluminarine ligand w/o (A) and with G-4 *c-MYC* (at molar ratio 1:10) (B) in Tris-HCl buffer (10 mM, pH 7.2) containing 100 mM KCl.

**Table S1.** The fluorescence lifetimes calculated for 9-methoxyluminarine and its complexes with DNA (9-MeLM/DNA, 1:5) in Tris-HCl buffer (10 mM, pH 7.2). The estimated value of lifetime resolution is  $\Delta\tau = 0.02$  ns.

**Figure S3.** Benesi-Hildebrand plots of fluorescence binding data of 9-methoxyluminarine ligand with G-quadruplexes: *c-MYC* (A), 22HT/K (B), 22HT/Na (C), TBA (D), ds26 (E).

**Figure S4.** CD spectra of G-quadruplexes: 22HT/Na (A, B), 22HT/K (C, D), *c-MYC* (E,F), TBA (G,H) (2  $\mu$ M) in sodium cacodylate buffer (10 mM, pH 7.2) containing 100 mM NaCl (A,B) or 100 mM KCl (C-H) recorded in the temperature range 10-90 °C. Spectra A, C, E, G registered in the absence of 9-methoxyluminarine ligand and B, D, F, H in the presence of ligand.

**Figure S5.** Normalized CD melting profiles of G-quadruplexes (2 $\mu$ M) with and without 3 equiv. of 9-MeLM (L) in 10 mM sodium cacodylate buffer (pH 7.2) containing 100 mM NaCl (A), 100 mM KCl (B, D) and 10 mM KCl/90 mM LiCl (C). The effect of heating and cooling on CD profiles of G4s in

the absence and presence of 9-MeLM : solid lines are annealing curves, short dash lines are melting curves.

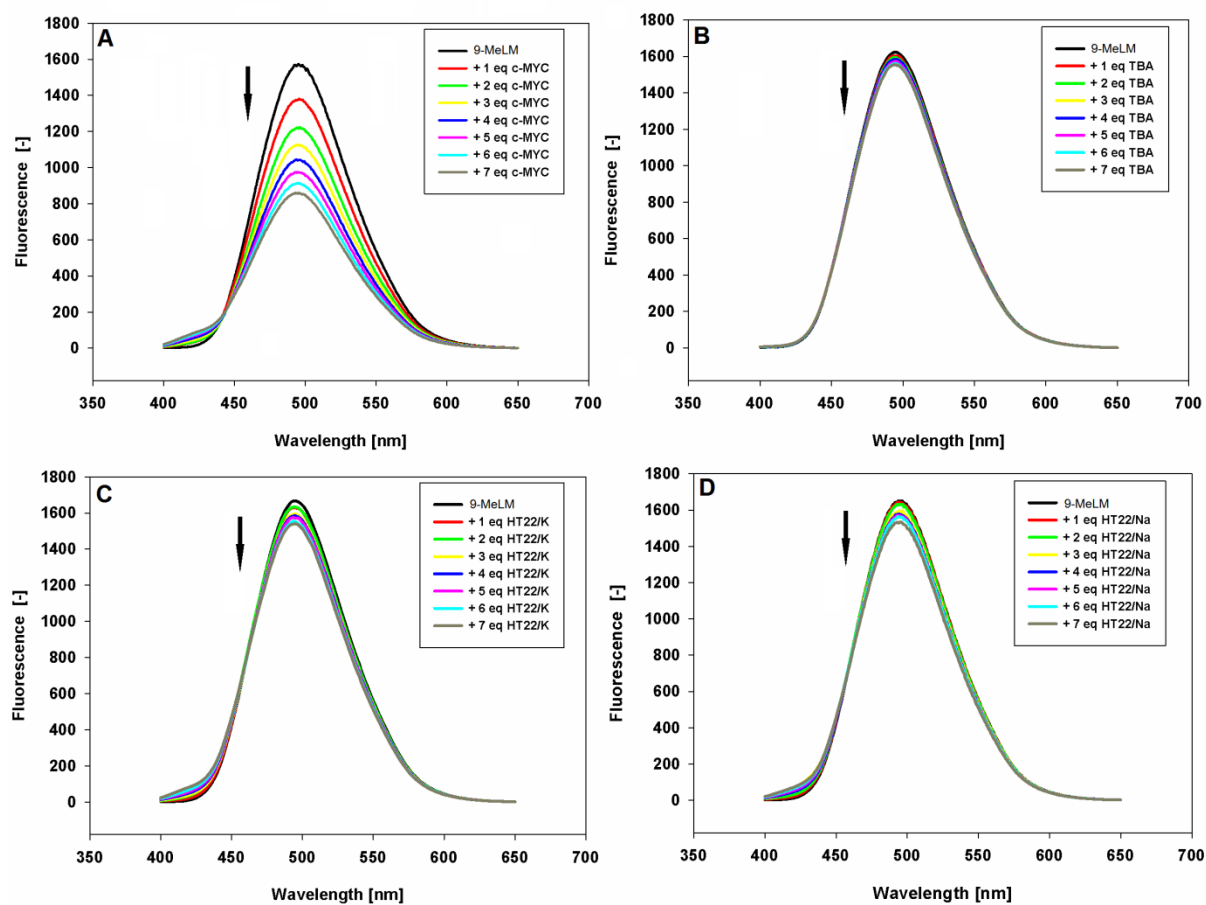

**Figure S1.** Fluorescence titration spectra of 9-methoxyluminarine (9-MeLM) ligand (1  $\mu$ M) with G4 *c-MYC* (A), G4 TBA (B), G4 22HT/K (C) and G4 22HT/Na (D) (0–7  $\mu$ M) in Tris-HCl buffer (10 mM, pH 7.2) containing 100 mM KCl (A-C) or 100 mM NaCl (D).

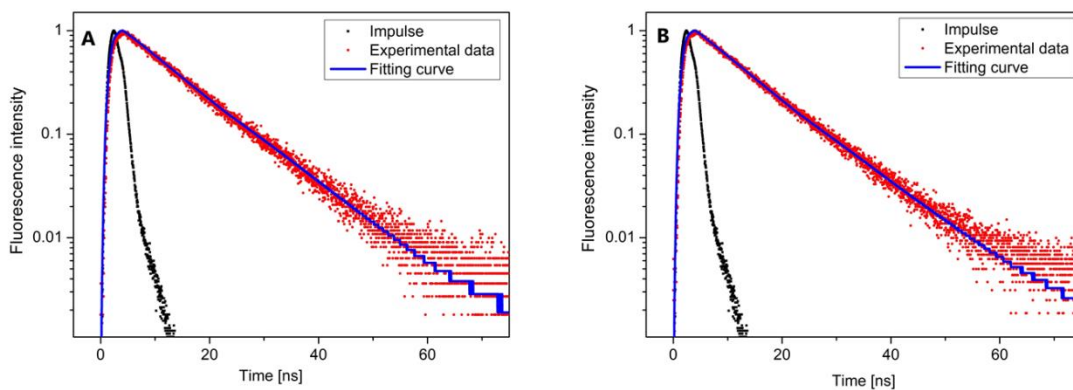

**Figure S2.** Emission decay curves of 9-methoxyluminarine ligand w/o (A) and with G-4 *c-MYC* (at molar ratio 1:10) (B) in Tris-HCl buffer (10 mM, pH 7.2) containing 100 mM KCl.

**Table S1.** The fluorescence lifetimes calculated for 9-methoxyluminarine and its complexes with DNA (9-MeLM/DNA, 1:5) in Tris-HCl buffer (10 mM, pH 7.2). The estimated value of lifetime resolution is  $\Delta\tau = 0.02$  ns.

| Cations                | 9-MeLM    | 9-MeLM/ <i>c-MYC</i> | 9-MeLM/22HT | 9-MeLM/TBA | 9-MeLM/ds26 |
|------------------------|-----------|----------------------|-------------|------------|-------------|
| 100 mM K <sup>+</sup>  | 9.98 (ns) | 9.98 (ns)            | 9.96 (ns)   | 9.96 (ns)  | ---         |
| 100 mM Na <sup>+</sup> | 9.80 (ns) | ---                  | 9.96 (ns)   | ---        | 10.10 (ns)  |

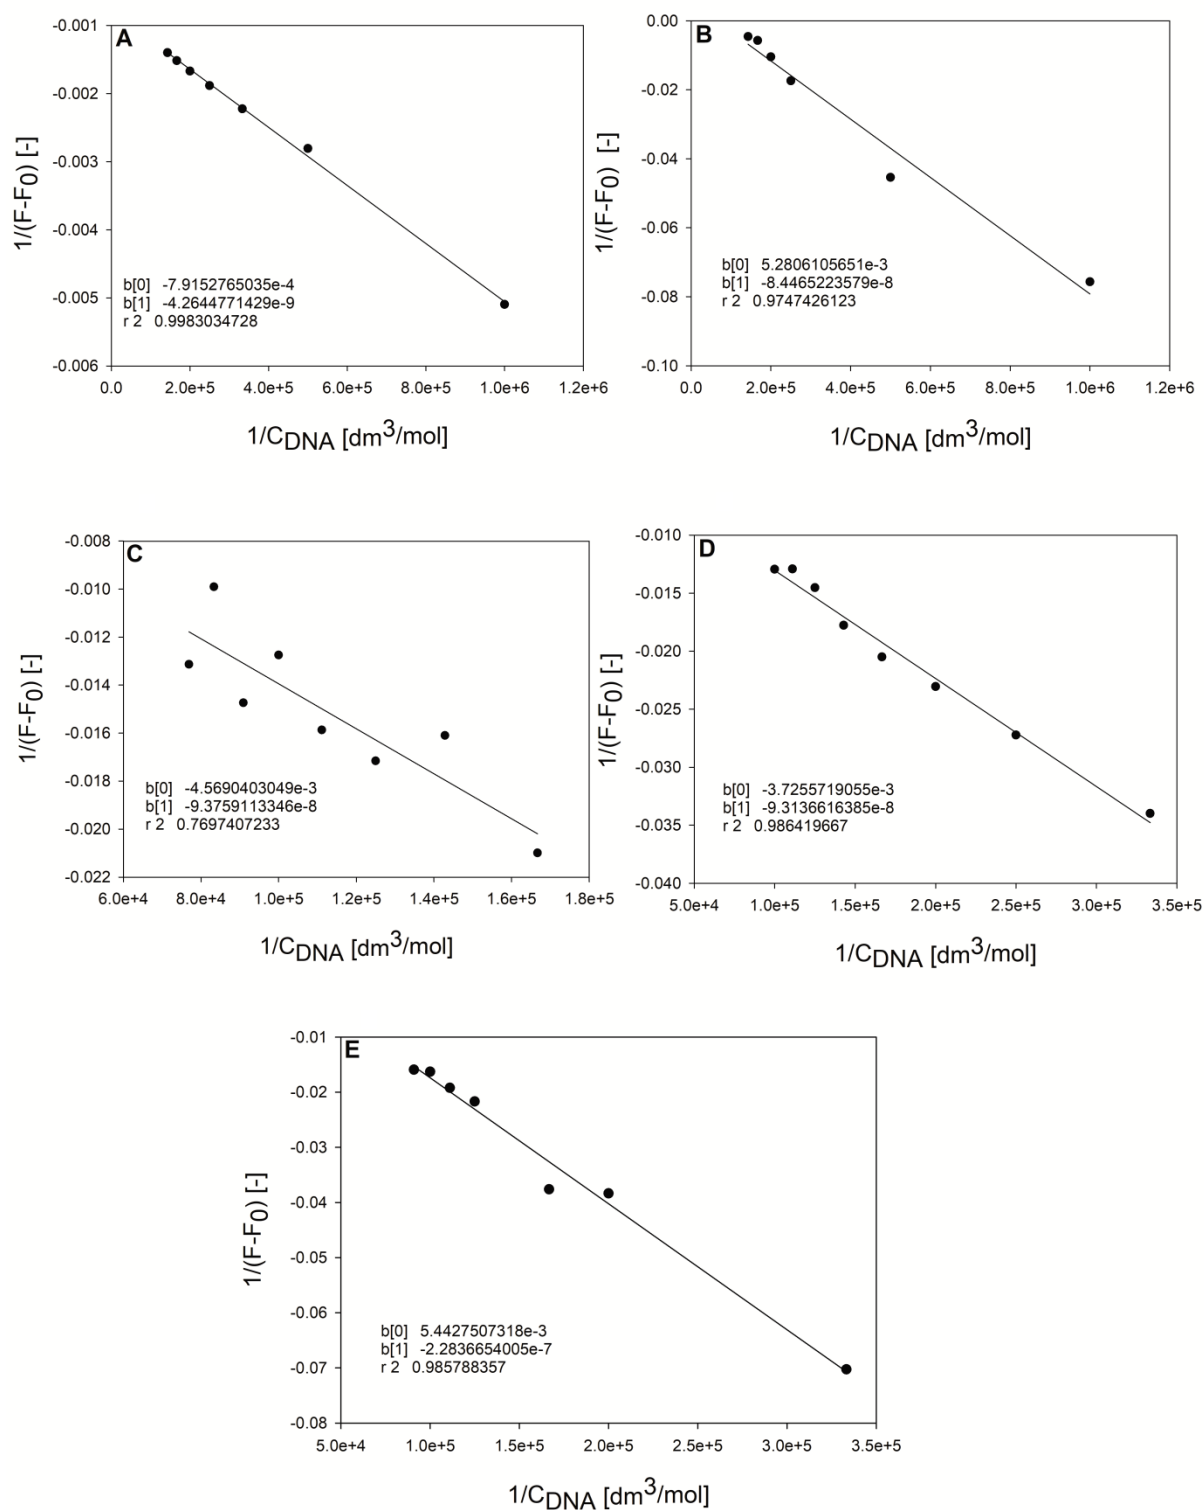

**Figure S3.** Benesi-Hildebrand plots of fluorescence binding data of 9-methoxyluminarine ligand with G-quadruplexes: *c-MYC* (A), 22HT/K (B), 22HT/Na (C), TBA (D), ds26 (E).

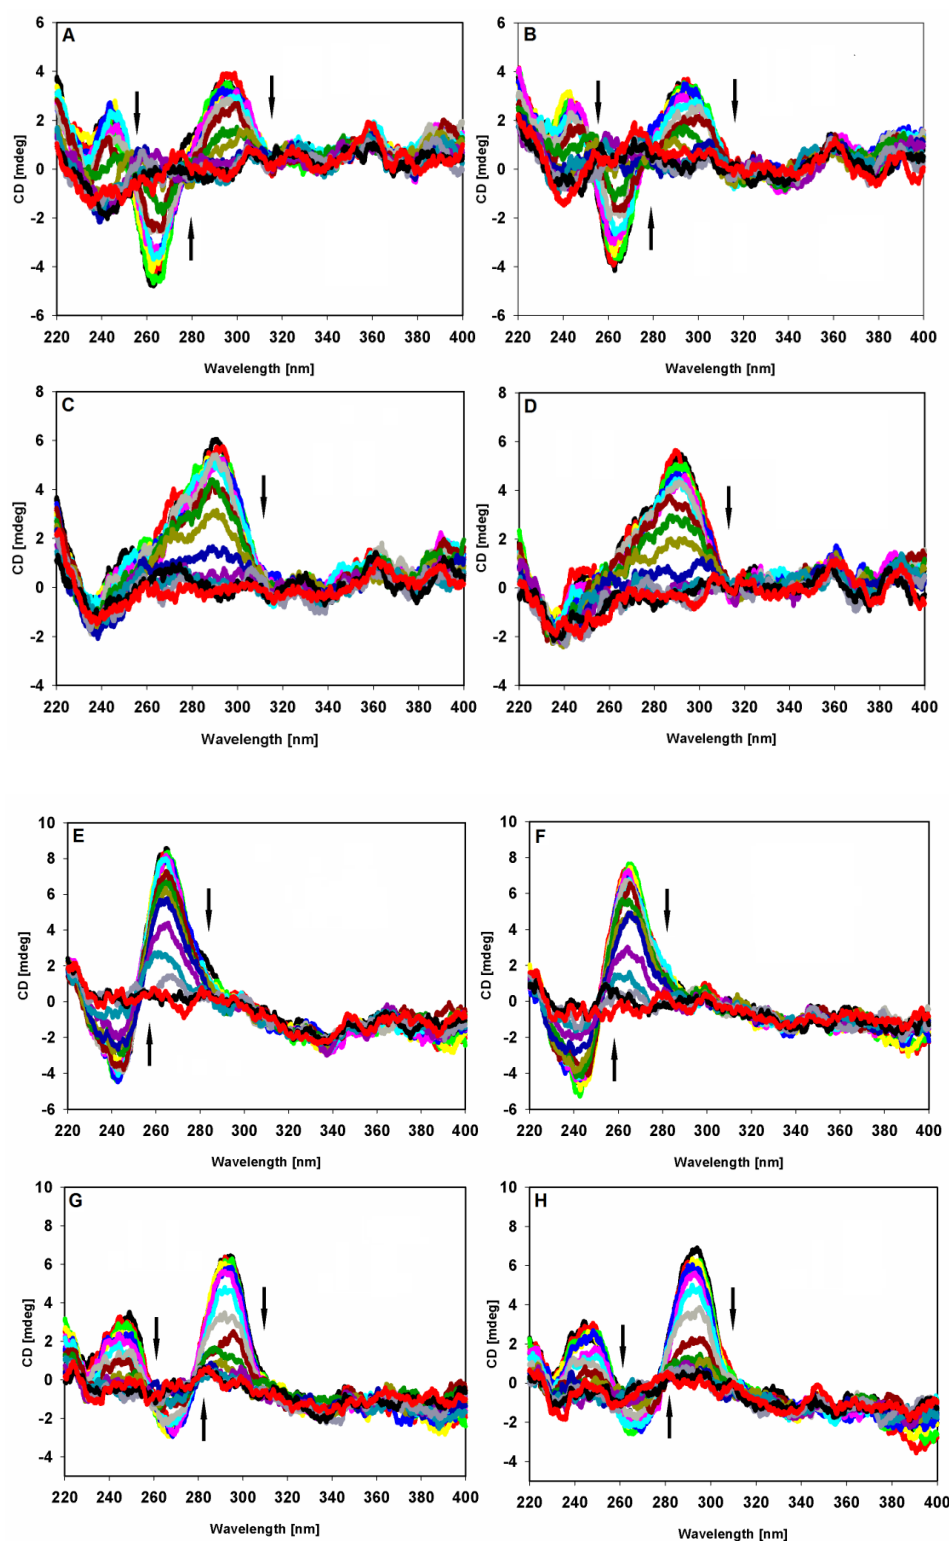

**Figure S4.** CD spectra of G-quadruplexes: 22HT/Na (A, B), 22HT/K (C, D), *c-MYC* (E,F), TBA (G,H) (2  $\mu$ M) in sodium cacodylate buffer (10 mM, pH 7.2) containing 100 mM NaCl (A,B) or 100 mM KCl C-H) recorded in the temperature range 10-90  $^{\circ}$ C. Spectra A, C, E, G registered in the absence of 9-methoxyluminarine ligand and B, D, F, H in the presence of ligand.

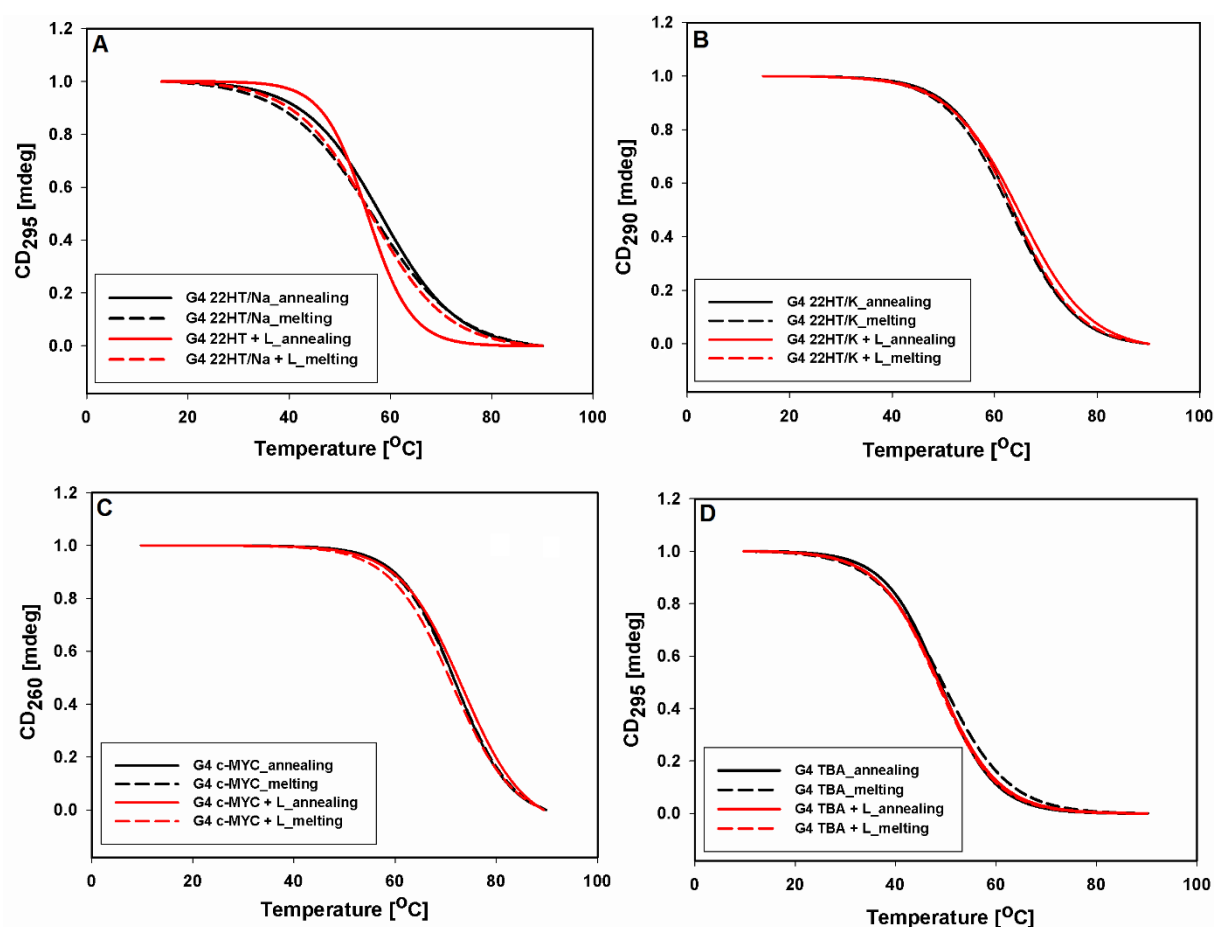

**Figure S5.** Normalized CD melting profiles of G-quadruplexes (2 $\mu$ M) with and without 3 equiv. of 9-MeLM (L) in 10 mM sodium cacodylate buffer (pH 7.2) containing 100 mM NaCl (A), 100 mM KCl (B, D) and 10 mM KCl/90 mM LiCl (C). The effect of heating and cooling on CD profiles of G4s in the absence and presence of 9-MeLM: solid lines are annealing curves, short dash lines are melting curves.
